# Supplementary material for: Gemfibrozil-Induced Intracellular Triglyceride Increase in SH-SY5Y, HEK and Calu-3 Cells
Source: MDPI journal article supplement (doi:10.3390/ijms24032972), 2023-02-03
Supplement: s1 [file s1]

## Supplementary Material

### **Gemfibrozil-induced intracellular Triglyceride increase in SH-SY5Y, HEK and Calu-3 cells**

**Cornel Manuel Bachmann <sup>1,†</sup>, Daniel Janitschke <sup>1,†</sup>, Anna Andrea Lauer <sup>1,2</sup>, Tobias Erhardt <sup>3</sup>,  
Tobias Hartmann <sup>1,4</sup>, Marcus Otto Walter Grimm <sup>1,2,4,\*‡</sup> and Heike Sabine Grimm <sup>1,2,\*‡</sup>**

<sup>1</sup> Experimental Neurology, Saarland University, 66421 Homburg, Germany

<sup>2</sup> Nutrition Therapy and Counseling, Campus Rheinland, SRH University of Applied Health Sciences, 51377 Leverkusen, Germany

<sup>3</sup> Physical Therapy, Campus Karlsruhe, SRH University of Applied Health Sciences, 76185 Karlsruhe, Germany

<sup>4</sup> Deutsches Institut für DemenzPrävention (DIDP), Saarland University, 66421 Homburg, Germany

\* Correspondence: marcus.grimm@uks.eu (M.O.W.G.); heike.grimm.extern@srh.de (H.S.G.)

† These first authors contributed equally to this work.

‡ These senior authors contributed equally to this work.

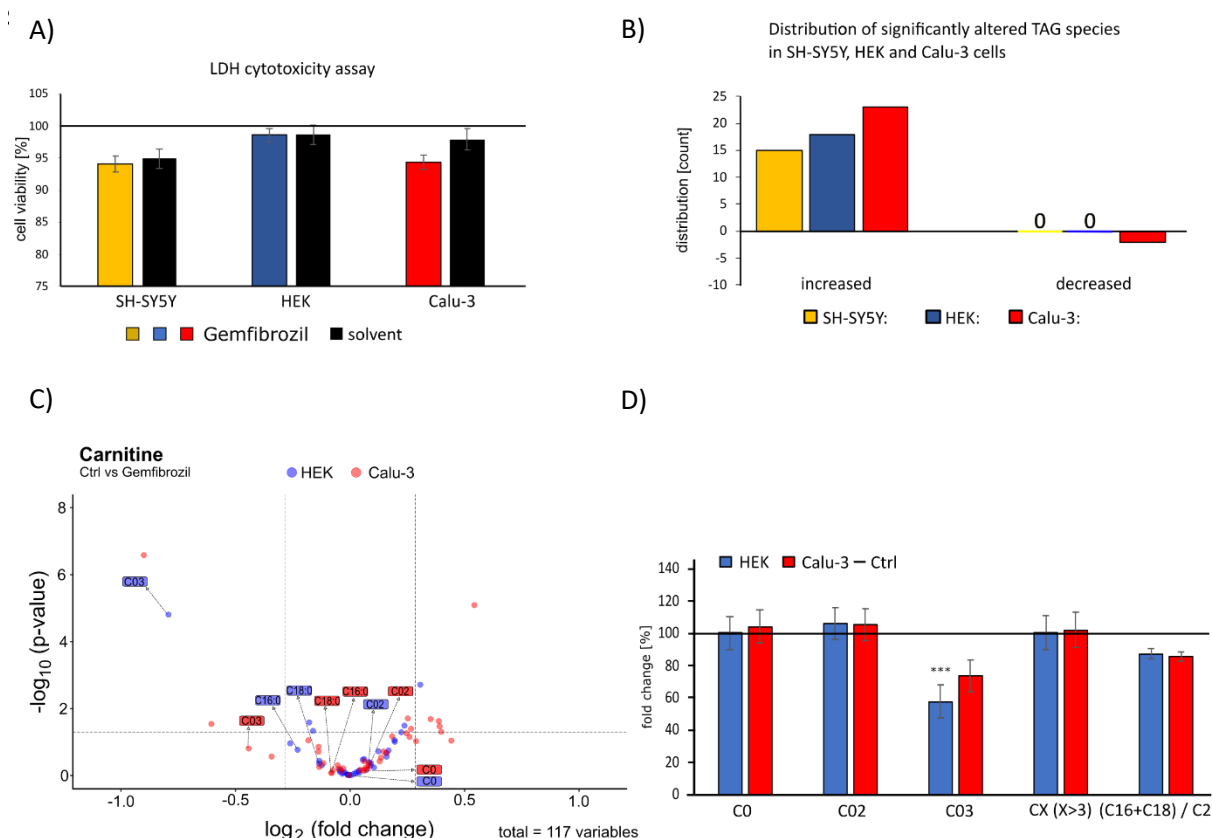

**Supplemental figure S1: A)** Investigation of cell viability after incubation of SH-SY5Y, HEK and Calu-3 cells with 100  $\mu\text{mol/l}$  gemfibrozil for 72 h (0 + 24 + 48 h) via cytotoxicity detection assay. Care was taken not to exceed 6% of cytotoxicity. **B)** A bar chart shows the distribution of significantly altered TAG-species after gemfibrozil treatment in SH-SY5Y, HEK and Calu-3 cells. All species were considered that fell below the significance level of  $p = 0.05$ . On the left side all significantly increased species for each cell type are shown. On the right side are all significantly decreased species illustrated. **C)** Changed carnitine levels in HEK and Calu-3 cells after gemfibrozil treatment compared to cells treated with the solvent control (ethanol) are illustrated in the volcano plot. The fold change (x-axis) of each of the 41 examined carnitine species (dots) was plotted against the corresponding logarithmic p-value (y-axis). A detailed structure of the volcano plot is explained in the legend of figure 1. **D)** The bar chart shows the changes in C0, C2, C3, CX ( $X > 3$ ) and (C16 + C18)/C2 ratio in gemfibrozil treated HEK and Calu-3 cells compared to cells treated with the solvent control (ethanol), which is represented as the horizontal line and set as 100%. The obtained data were calculated by using the students t-test comparing gemfibrozil-treated cells against the control of each cell line.

A)

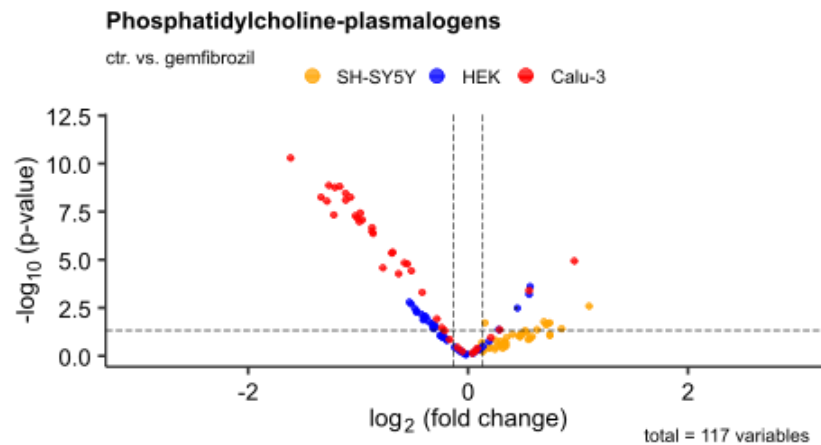

B)

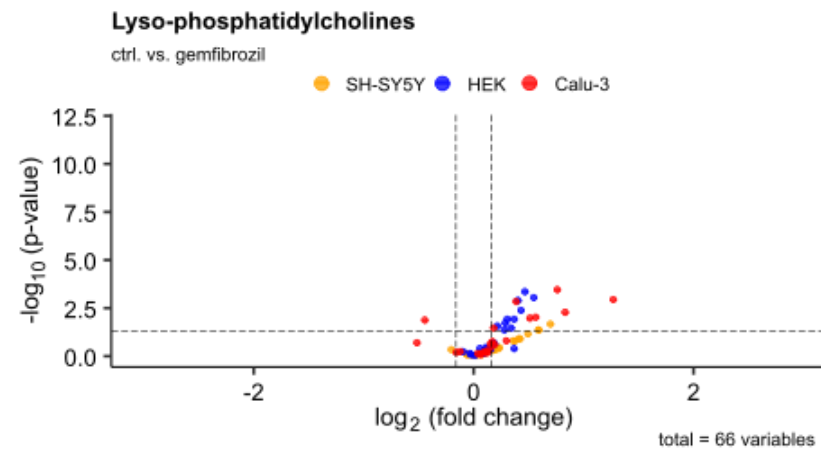

C)

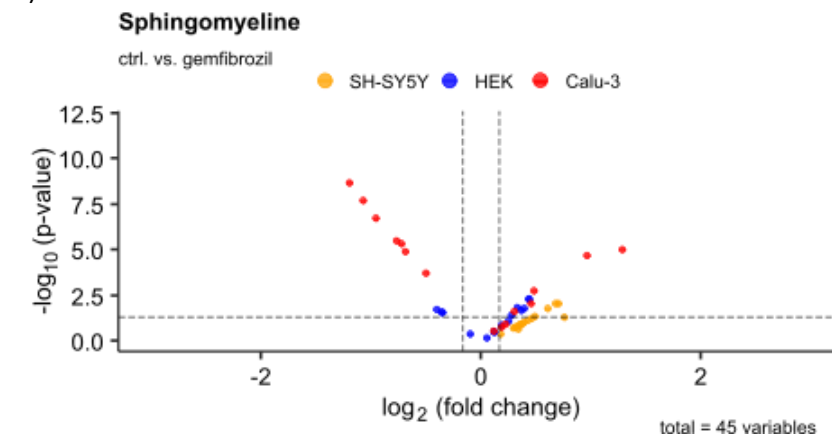

**Supplemental figure S2:** A) - C) changed Phosphatidylcholine-plasmalogen (PCae), Lyso-phosphatidylcholine (Lyso-PC) and Sphingomyelin (SM) levels in SH-SY5Y, HEK and Calu-3 cells after gemfibrozil treatment compared to cells treated with the solvent control (ethanol) are illustrated in the volcano plots (A – C), where the fold change (x-axis) of each of the examined lipid species (dots) was plotted against the corresponding logarithmic p-value (y-axis). All three cell lines are shown in one volcano plot with three different colors: SH-SY5Y in orange, HEK in blue and Calu-3 in red.

#### 4.1. Chemicals, Reagents, Standards

HPLC-grade pyridine, phenyl isothiocyanate (PITC) and ammonium acetate used for lipid extraction were purchased from Merck (Darmstadt, Germany). All other chemicals including high performance liquid chromatography (HPLC)-grade water, ethanol, and methanol were purchased from Fisher Scientific (Schwerte, Germany), if not stated otherwise. Gemfibrozil was kindly provided in form of Gevilon® 600 mg (from Pfizer) by the Kronen-Apotheke, 09212 Limbach-Oberfrohna, Germany. For normalization the following standards from Avanti Polar Lipids were used: 06:0 PC (DHPC), 19:0 Lyso PC, 06:0 SM (d18:1/6:0), and Splash II Lipidomix Mass Spec Internal Standard. The carnitine standards octanoyl-L-carnitine d3 and palmitoyl-L-carnitine d3 were purchased from Supelco Analytical.

#### 4.6. Targeted Shotgun Mass Spectrometry

Table S5 lists all validation parameters required for shotgun mass spectrometry. A detailed description of the validation and their respective origin data can be found in Lauer et al. [32].

**Table S5:** Overview of the used validation parameters for Mass spectrometry analysis in this study. For the data obtained in this work, the experimental conditions of Lauer et. al. [32] were adopted. The focus was on average extraction efficiency, linearity for each lipid class, intra- and inter-day variance, and potential matrix effects.

| Validation parameter                             | result       |
|--------------------------------------------------|--------------|
| Average extraction efficiency                    | > 80.7 %     |
| Intra-day variance (extraction)                  | 3.9 %        |
| Linearity of PC aa                               | $R^2 = 0.98$ |
| Linearity of PC ae                               | $R^2 = 0.97$ |
| Linearity of Lyso-PC                             | $R^2 = 0.96$ |
| Linearity of SM                                  | $R^2 = 0.98$ |
| Linearity of C16                                 | $R^2 = 0.99$ |
| Linearity of TAG                                 | $R^2 = 0.99$ |
| Intra- and inter-day variance of lipid detection | 6.5 %        |
| Potential matrix effects                         | < 3.2 %      |

## Group analysis

**Table S6:** Results of group analysis of the raw data of **triglycerides** (TAG) total. In this analysis we calculated via a Two-Factor ANOVA (Factor 1 treatment (control vs gemfibrozil) and Factor 2 cell line (Calu-3, HEK and SH-SY5Y). Following this we calculated the p-values of each combination via the post hoc test TukeyHSD (calculated p-values shown in the table below). Prior to this we used the LeveneTest to determine if the homogeneity of variances was given for this model (see p-value LeveneTest:  $p = 0.5558$ ).

|                  | SH-SY5Y<br>ctrl            | SH-SY5Y<br>gemfi           | HEK<br>ctrl                | HEK<br>gemfi               | Calu-3<br>ctrl             | Calu-3<br>gemfi            |
|------------------|----------------------------|----------------------------|----------------------------|----------------------------|----------------------------|----------------------------|
| SH-SY5Y<br>ctrl  | -                          | $p = 6.06 \times 10^{-4}$  | $p = 8.57 \times 10^{-1}$  | $p = 9.72 \times 10^{-11}$ | $p = 8.09 \times 10^{-11}$ | $p = 8.16 \times 10^{-13}$ |
| SH-SY5Y<br>gemfi | $p = 6.06 \times 10^{-4}$  | -                          | $p = 1.23 \times 10^{-2}$  | $p = 1.10 \times 10^{-4}$  | $p = 9.00 \times 10^{-5}$  | $p = 8.16 \times 10^{-13}$ |
| HEK<br>ctrl      | $p = 8.57 \times 10^{-1}$  | $p = 1.23 \times 10^{-2}$  | -                          | $p = 1.31 \times 10^{-9}$  | $p = 1.08 \times 10^{-9}$  | $p = 8.15 \times 10^{-13}$ |
| HEK<br>gemfi     | $p = 9.72 \times 10^{-11}$ | $p = 1.10 \times 10^{-4}$  | $p = 1.31 \times 10^{-9}$  | -                          | $p = 9.99 \times 10^{-1}$  | $p = 8.33 \times 10^{-13}$ |
| Calu-3<br>ctrl   | $p = 8.09 \times 10^{-11}$ | $p = 9.00 \times 10^{-5}$  | $p = 1.08 \times 10^{-9}$  | $p = 9.99 \times 10^{-1}$  | -                          | $p = 8.34 \times 10^{-13}$ |
| Calu-3<br>gemfi  | $p = 8.16 \times 10^{-13}$ | $p = 8.16 \times 10^{-13}$ | $p = 8.15 \times 10^{-13}$ | $p = 8.33 \times 10^{-13}$ | $p = 8.34 \times 10^{-13}$ | -                          |

**Table S7:** Results of group analysis of the raw data of **acylcarnitines** (C) total. In this analysis we calculated via a Two-Factor ANOVA (Factor 1 treatment (control vs gemfibrozil) and Factor 2 cell line (Calu-3, HEK and SH-SY5Y). Following this we calculated the p-values of each combination via the post hoc test TukeyHSD (calculated p-values shown in the table below). Prior to this we used the LeveneTest to determine if the homogeneity of variances was given for this model (see p-value LeveneTest:  $p = 0.2301$ ).

|                  | SH-SY5Y<br>ctrl           | SH-SY5Y<br>gemfi          | HEK<br>ctrl               | HEK<br>gemfi              | Calu-3<br>ctrl            | Calu-3<br>gemfi           |
|------------------|---------------------------|---------------------------|---------------------------|---------------------------|---------------------------|---------------------------|
| SH-SY5Y<br>ctrl  | -                         | $p = 9.99 \times 10^{-1}$ | $p = 8.90 \times 10^{-1}$ | $p = 9.10 \times 10^{-1}$ | $p = 6.54 \times 10^{-3}$ | $p = 2.30 \times 10^{-3}$ |
| SH-SY5Y<br>gemfi | $p = 9.99 \times 10^{-1}$ | -                         | $p = 9.21 \times 10^{-1}$ | $p = 9.39 \times 10^{-1}$ | $p = 3.08 \times 10^{-3}$ | $p = 1.01 \times 10^{-3}$ |
| HEK<br>ctrl      | $p = 8.90 \times 10^{-1}$ | $p = 9.21 \times 10^{-1}$ | -                         | $p = 9.99 \times 10^{-1}$ | $p = 1.53 \times 10^{-4}$ | $p = 4.66 \times 10^{-5}$ |
| HEK<br>gemfi     | $p = 9.10 \times 10^{-1}$ | $p = 9.39 \times 10^{-1}$ | $p = 9.99 \times 10^{-1}$ | -                         | $p = 1.85 \times 10^{-4}$ | $p = 5.64 \times 10^{-5}$ |
| Calu-3<br>ctrl   | $p = 6.54 \times 10^{-3}$ | $p = 3.08 \times 10^{-3}$ | $p = 1.53 \times 10^{-4}$ | $p = 1.85 \times 10^{-4}$ | -                         | $p = 9.99 \times 10^{-1}$ |
| Calu-3<br>gemfi  | $p = 2.30 \times 10^{-3}$ | $p = 1.01 \times 10^{-3}$ | $p = 4.66 \times 10^{-5}$ | $p = 5.64 \times 10^{-5}$ | $p = 9.99 \times 10^{-1}$ | -                         |

**Table S8:** Results of group analysis of the raw data of **phosphatidylcholines** (PC aa) total. In this analysis we calculated via a Two-Factor ANOVA (Factor 1 treatment (control vs gemfibrozil) and Factor 2 cell line (Calu-3, HEK and SH-SY5Y). Following this we calculated the p-values of each combination via the post hoc test TukeyHSD (calculated p-values shown in the table below). Prior to this we used the LeveneTest to determine if the homogeneity of variances was given for this model (see p-value LeveneTest:  $p = 0.2834$ ).

|                  | SH-SY5Y<br>ctrl           | SH-SY5Y<br>gemfi          | HEK<br>ctrl               | HEK<br>gemfi              | Calu-3 ctrl               | Calu-3<br>gemfi           |
|------------------|---------------------------|---------------------------|---------------------------|---------------------------|---------------------------|---------------------------|
| SH-SY5Y<br>ctrl  | -                         | $p = 5.35 \times 10^{-1}$ | $p = 9.99 \times 10^{-1}$ | $p = 5.63 \times 10^{-1}$ | $p = 2.86 \times 10^{-1}$ | $p = 4.77 \times 10^{-3}$ |
| SH-SY5Y<br>gemfi | $p = 5.35 \times 10^{-1}$ | -                         | $p = 5.86 \times 10^{-1}$ | $p = 1.000$               | $p = 9.97 \times 10^{-1}$ | $p = 2.42 \times 10^{-1}$ |
| HEK<br>ctrl      | $p = 9.99 \times 10^{-1}$ | $p = 5.86 \times 10^{-1}$ | -                         | $p = 6.15 \times 10^{-1}$ | $p = 3.18 \times 10^{-1}$ | $p = 4.83 \times 10^{-3}$ |
| HEK<br>gemfi     | $p = 5.63 \times 10^{-1}$ | $p = 1.000$               | $p = 6.15 \times 10^{-1}$ | -                         | $p = 9.96 \times 10^{-1}$ | $p = 2.23 \times 10^{-1}$ |
| Calu-3<br>ctrl   | $p = 2.86 \times 10^{-1}$ | $p = 9.97 \times 10^{-1}$ | $p = 3.18 \times 10^{-1}$ | $p = 9.96 \times 10^{-1}$ | -                         | $p = 4.84 \times 10^{-1}$ |
| Calu-3<br>gemfi  | $p = 4.77 \times 10^{-3}$ | $p = 2.42 \times 10^{-1}$ | $p = 4.83 \times 10^{-3}$ | $p = 2.23 \times 10^{-1}$ | $p = 4.84 \times 10^{-1}$ | -                         |

**Table S9:** Results of group analysis of the raw data of **phosphatidylcholines-plasmalogens** (PC ae) total. In this analysis we calculated via a Two-Factor ANOVA (Factor 1 treatment (control vs gemfibrozil) and Factor 2 cell line (Calu-3, HEK and SH-SY5Y). Following this we calculated the p-values of each combination via the post hoc test TukeyHSD (calculated p-values shown in the table below). Prior to this we used the LeveneTest to determine if the homogeneity of variances was given for this model. (See p-value LeveneTest:  $p = 0.3274$ ).

|                  | SH-SY5Y<br>ctrl               | SH-SY5Y<br>gemfi           | HEK<br>ctrl               | HEK gemfi                 | Calu-3<br>ctrl                | Calu-3<br>gemfi            |
|------------------|-------------------------------|----------------------------|---------------------------|---------------------------|-------------------------------|----------------------------|
| SH-SY5Y<br>ctrl  | -                             | $p = 3.47 \times 10^{-1}$  | $p = 3.18 \times 10^{-8}$ | $p = 2.61 \times 10^{-8}$ | $p \leq 1.88 \times 10^{-12}$ | $p = 7.99 \times 10^{-11}$ |
| SH-SY5Y<br>gemfi | $p = 3.47 \times 10^{-1}$     | -                          | $p = 1.18 \times 10^{-5}$ | $p = 9.58 \times 10^{-6}$ | $p = 1.47 \times 10^{-10}$    | $p = 1.81 \times 10^{-8}$  |
| HEK<br>ctrl      | $p = 3.18 \times 10^{-8}$     | $p = 1.18 \times 10^{-5}$  | -                         | $p = 9.99 \times 10^{-1}$ | $p = 1.16 \times 10^{-2}$     | $p = 3.58 \times 10^{-1}$  |
| HEK<br>gemfi     | $p = 2.61 \times 10^{-8}$     | $p = 9.58 \times 10^{-6}$  | $p = 9.99 \times 10^{-1}$ | -                         | $p = 1.38 \times 10^{-2}$     | $p = 3.94 \times 10^{-1}$  |
| Calu-3<br>ctrl   | $p \leq 1.88 \times 10^{-12}$ | $p = 1.47 \times 10^{-10}$ | $p = 1.16 \times 10^{-2}$ | $p = 1.38 \times 10^{-2}$ | -                             | $p = 6.33 \times 10^{-1}$  |
| Calu-3<br>gemfi  | $p = 7.99 \times 10^{-11}$    | $p = 1.81 \times 10^{-8}$  | $p = 3.58 \times 10^{-1}$ | $p = 3.94 \times 10^{-1}$ | $p = 6.33 \times 10^{-1}$     | -                          |

**Table S10:** Results of group analysis of the raw data of **Lyso-phosphatidylcholines** (Lyso-PC) total. In this analysis we calculated via a Two-Factor ANOVA (Factor 1 treatment (control vs gemfibrozil) and Factor 2 cell line (Calu-3, HEK and SH-SY5Y). Following this we calculated the p-values of each combination via the post hoc test TukeyHSD (calculated p-values shown in the table below). Prior to this we used the LeveneTest to determine if the homogeneity of variances was given for this model (see p-value LeveneTest:  $p = 0.1611$ ).

|                  | SH-SY5Y<br>ctrl            | SH-SY5Y<br>gemfi          | HEK<br>ctrl               | HEK<br>gemfi               | Calu-3<br>ctrl            | Calu-3<br>gemfi           |
|------------------|----------------------------|---------------------------|---------------------------|----------------------------|---------------------------|---------------------------|
| SH-SY5Y<br>ctrl  | -                          | $p = 6.89 \times 10^{-1}$ | $p = 1.11 \times 10^{-5}$ | $p = 8.29 \times 10^{-10}$ | $p = 8.99 \times 10^{-1}$ | $p = 6.38 \times 10^{-3}$ |
| SH-SY5Y<br>gemfi | $p = 6.89 \times 10^{-1}$  | -                         | $p = 7.15 \times 10^{-4}$ | $p = 3.65 \times 10^{-8}$  | $p = 9.99 \times 10^{-1}$ | $p = 1.84 \times 10^{-1}$ |
| HEK<br>ctrl      | $p = 1.11 \times 10^{-5}$  | $p = 7.15 \times 10^{-4}$ | -                         | $p = 4.06 \times 10^{-2}$  | $p = 1.88 \times 10^{-4}$ | $p = 2.97 \times 10^{-1}$ |
| HEK<br>gemfi     | $p = 8.29 \times 10^{-10}$ | $p = 3.65 \times 10^{-8}$ | $p = 4.06 \times 10^{-2}$ | -                          | $p = 9.33 \times 10^{-9}$ | $p = 8.32 \times 10^{-5}$ |
| Calu-3<br>ctrl   | $p = 8.99 \times 10^{-1}$  | $p = 9.99 \times 10^{-1}$ | $p = 1.88 \times 10^{-4}$ | $p = 9.33 \times 10^{-9}$  | -                         | $p = 7.44 \times 10^{-2}$ |
| Calu-3<br>gemfi  | $p = 6.38 \times 10^{-3}$  | $p = 1.84 \times 10^{-1}$ | $p = 2.97 \times 10^{-1}$ | $p = 8.32 \times 10^{-5}$  | $p = 7.44 \times 10^{-2}$ | -                         |

**Table S11:** Results of group analysis of the raw data of **Sphingomyelins** (SM) total. In this analysis we calculated via a Two-Factor ANOVA (Factor 1 treatment (control vs gemfibrozil) and Factor 2 cell line (Calu-3, HEK and SH-SY5Y). Following this we calculated the p-values of each combination via the post hoc test TukeyHSD (calculated p-values shown in the table below). Prior to this we used the LeveneTest to determine if the homogeneity of variances was given for this model. (See p-value LeveneTest:  $p = 0.1624$ ).

|                  | SH-SY5Y<br>ctrl           | SH-SY5Y<br>gemfi          | HEK<br>ctrl               | HEK<br>gemfi              | Calu-3<br>ctrl            | Calu-3<br>gemfi           |
|------------------|---------------------------|---------------------------|---------------------------|---------------------------|---------------------------|---------------------------|
| SH-SY5Y<br>ctrl  | -                         | $p = 1.47 \times 10^{-1}$ | $p = 6.61 \times 10^{-2}$ | $p = 5.26 \times 10^{-4}$ | $p = 1.10 \times 10^{-3}$ | $p = 1.24 \times 10^{-4}$ |
| SH-SY5Y<br>gemfi | $p = 1.47 \times 10^{-1}$ | -                         | $p = 9.98 \times 10^{-1}$ | $p = 2.68 \times 10^{-1}$ | $p = 3.96 \times 10^{-1}$ | $p = 1.06 \times 10^{-1}$ |
| HEK<br>ctrl      | $p = 6.61 \times 10^{-2}$ | $p = 9.98 \times 10^{-1}$ | -                         | $p = 4.99 \times 10^{-1}$ | $p = 6.56 \times 10^{-1}$ | $p = 2.42 \times 10^{-1}$ |
| HEK<br>gemfi     | $p = 5.26 \times 10^{-4}$ | $p = 2.68 \times 10^{-1}$ | $p = 4.99 \times 10^{-1}$ | -                         | $p = 9.99 \times 10^{-1}$ | $p = 9.97 \times 10^{-1}$ |
| Calu-3<br>ctrl   | $p = 1.10 \times 10^{-3}$ | $p = 3.96 \times 10^{-1}$ | $p = 6.56 \times 10^{-1}$ | $p = 9.99 \times 10^{-1}$ | -                         | $p = 9.78 \times 10^{-1}$ |
| Calu-3<br>gemfi  | $p = 1.24 \times 10^{-4}$ | $p = 1.06 \times 10^{-1}$ | $p = 2.42 \times 10^{-1}$ | $p = 9.97 \times 10^{-1}$ | $p = 9.78 \times 10^{-1}$ | -                         |
