# Supplementary material for: Gemfibrozil-Induced Intracellular Triglyceride Increase in SH-SY5Y, HEK and Calu-3 Cells
Source: Int J Mol Sci. 2023 Feb 3;24(3):2972. doi: 10.3390/ijms24032972 (PMC9917468; doi:10.3390/ijms24032972)
Supplement: Supplementary file 1 [file ijms-24-02972-s001.zip › ijms-2158195_supplemental table.xlsx]

## Sheet: suppl. table S1
Gemfibrozil-induced intracellular Triglyceride increase in SH-SY5Y, HEK and Calu-3 cells
supplemental table S1:
mean fold change gemfibrozil versus control in SH-SY5Y, HEK and Calu-3 cells
		mean fold change gemfibrozil vs control [%]
Species	Lipid	SH-SY5Y	HEK	Calu-3
PC aa	PC aa C20:0	94.4528	104.831	97.2433
	PC aa C24:0	107.639	113.929	97.1973
	PC aa C26:0	104.893	120.261	108.004
	PC aa C28:0	95.9762	152.236	96.8727
	PC aa C28:1	89.022	124.88	121.498
	PC aa C30:0	114.407	138.004	96.3048
	PC aa C30:2	103.566	126.877	115.721
	PC aa C32:0	97.3319	134.936	139.176
	PC aa C32:1	103.066	132.169	174.211
	PC aa C32:2	94.1053	138.401	240.921
	PC aa C32:3	104.334	136.891	162.271
	PC aa C34:1	99.5414	114.411	122.828
	PC aa C34:2	101.374	121.717	154.049
	PC aa C34:3	98.8798	113.689	123.694
	PC aa C34:4	91.3293	109.223	107.619
	PC aa C36:0	120.517	114.086	148.04
	PC aa C36:1	89.8073	112.272	137.503
	PC aa C36:2	96.4496	104.754	96.6206
	PC aa C36:3	95.4275	102.067	91.1113
	PC aa C36:4	98.6562	127.59	144.096
	PC aa C36:5	98.7696	107.962	136.946
	PC aa C36:6	95.3962	109.07	143.001
	PC aa C38:0	89.285	111.308	67.5482
	PC aa C38:1	93.3523	132.615	81.4738
	PC aa C38:3	94.3918	97.5227	70.2454
	PC aa C38:4	92.1492	119.52	109.855
	PC aa C38:5	94.1637	125.577	125.058
	PC aa C38:6	91.0935	125.008	145.747
	PC aa C40:0	110.076	126.563	111.551
	PC aa C40:1	94.082	136.209	99.9776
	PC aa C40:2	101.994	97.7482	77.186
	PC aa C40:3	103.982	77.8402	56.8097
	PC aa C40:4	86.2747	97.6408	82.8445
	PC aa C40:5	111.004	125.224	108.945
	PC aa C40:6	86.7735	121.83	127.709
	PC aa C42:0	95.4719	149.853	249.483
	PC aa C42:1	98.6124	185.222	298.555
	PC aa C42:2	103.925	129.936	118.399
	PC aa C42:4	119.024	86.4076	67.0495
	PC aa C42:5	90.3998	108.801	92.9012
	PC aa C42:6	110.023	119.741	109.529
	PC aa C44:0	123.924	150.057	153.64
	PC aa C48:0	136.44	151.652	100.566
PC ae	PC ae C30:0	112.858	103.088	58.1203
	PC ae C30:1	152.607	136.549	115.507
	PC ae C30:2	159.99	147.473	146.207
	PC ae C32:1	140.565	120.886	121.646
	PC ae C32:2	162.735	146.678	195.396
	PC ae C34:0	131.03	98.017	85.9197
	PC ae C34:1	124.027	97.8066	84.7045
	PC ae C34:2	126.164	109.315	104.5
	PC ae C34:3	138.085	107.853	88.6151
	PC ae C36:0	128.233	91.8861	96.1322
	PC ae C36:1	134.203	85.4081	81.9698
	PC ae C36:2	122.46	75.5074	54.5758
	PC ae C36:3	129.244	83.3501	51.1563
	PC ae C36:4	124.986	98.6044	74.5962
	PC ae C36:5	115.931	93.9809	66.6718
	PC ae C38:0	140.198	95.7264	93.2393
	PC ae C38:1	120.631	80.1675	61.9867
	PC ae C38:2	119.751	71.3955	41.5404
	PC ae C38:3	131.454	72.1403	44.4963
	PC ae C38:4	128.79	79.2581	47.5486
	PC ae C38:5	122.116	76.6182	32.5904
	PC ae C38:6	124.52	95.5539	69.9026
	PC ae C40:0	134.442	105.793	105.555
	PC ae C40:1 / PC aa C40:8	126.497	84.6168	61.7337
	PC ae C40:2	120.201	74.0104	46.1088
	PC ae C40:3	127.25	69.9181	43.0086
	PC ae C40:4	120.512	80.55	45.9751
	PC ae C40:5	118.127	80.3839	48.933
	PC ae C40:6	122.083	69.0841	39.4727
	PC ae C42:0	115.47	113.502	102.327
	PC ae C42:1	127.423	86.9435	64.2472
	PC ae C42:2	137.46	75.2822	41.0652
	PC ae C42:3	117.453	71.8949	50.327
	PC ae C42:4	107.87	77.9236	50.5274
	PC ae C42:5	108.403	84.725	49.5632
	PC ae C44:3	130.623	75.6774	42.7822
	PC ae C44:4	117.315	80.9334	54.7507
	PC ae C44:5	123.814	86.4989	54.4773
	PC ae C44:6	111.85	85.2789	67.9379
Lyso PC	Lyso PC C06:0	150.023	128.635	69.752
	Lyso PC C10:0	161.453	110.864	89.5555
	Lyso PC C12:0	150.036	98.3416	104.545
	lyso PC C14:0	133.454	137.784	110.639
	Lyso PC C16:0	116.36	134.311	141.759
	Lyso PC 16:1	114.447	145.405	240.855
	Lyso PC C17:0	129.776	100.351	102.168
	Lyso PC C18:0	133.077	132.218	168.952
	Lyso PC C18:1	140.079	126.033	177.248
	Lyso PC C18:2	117.636	113.463	122.62
	Lyso PC C18:3	106.676	113.11	104.767
	Lyso PC C20:0	101.668	115.837	112.471
	Lyso PC C20:3	98.6264	128.551	130.242
	Lyso PC C20:4	104.796	120.689	147.374
	Lyso PC C20:5	112.507	122.12	111.017
	Lyso PC C22:0	127.677	107.428	91.5419
	Lyso PC C22:6	114.82	123.624	113.838
	Lyso PC C24:0	95.6936	107.943	107.339
	Lyso PC C26:0	95.3395	105.989	108.913
	Lyso PC C26:1	86.8451	103.758	113.149
	Lyso PC C28:0	95.4692	97.5923	73.52
	Lyso PC C28:1	113.223	93.5364	106.638
SM	SM C14:1 OH	126.088	128.796	116.937
	SM C16:0	169.44	121.353	108.612
	SM C16:1	112.858	118.488	113.55
	SM C16:1 OH	152.607	130.867	136.68
	SM C18:0	159.99	135.134	195.531
	SM C18:1	140.565	135.375	244.377
	SM C20:2	162.735	108.064	123.412
	SM C22:1 OH	131.03	78.2392	47.6151
	SM C22:2 OH	124.027	75.6733	43.6218
	SM C22:3	126.164	109.179	139.34
	SM C24:0	138.085	125.297	62.0844
	SM C24:1	128.233	113.944	70.6
	SM C24:1 OH	134.203	78.0933	51.3644
	SM C26:0	122.46	103.677	60.3777
	SM C26:1	129.244	93.0535	58.6882
Carnitine	C0	124.986	100.19	104.301
	C02	115.931	105.883	105.403
	C03	140.198	57.7231	73.579
	C03 OH	120.631	117.877	104.23
	C03:1	119.751	111.678	119.744
	C04	131.454	123.657	113.544
	C04 OH / C3 DC	128.79	108.95	96.288
	C04:1	122.116	98.4308	104.411
	C05	124.52	89.4044	53.5766
	C05 M DC	134.442	103.915	97.923
	C05 OH / C3 M DC	126.497	99.6481	97.4009
	C05:1	120.201	111.55	91.1041
	C05:1 DC	127.25	105.078	105.851
	C06 / C4:1 DC	120.512	99.6721	92.26
	C06 OH / C5 DC	118.127	102.907	127.598
	C06:1	122.083	106.418	145.675
	C07 DC	115.47	97.6286	131.115
	C08	127.423	114.496	65.7109
	C08:1	137.46	101.04	120.268
	C09	117.453	107.497	104.847
	C10	107.87	116.749	110.65
	C10:1	108.403	99.6121	131.783
	C10:2	130.623	112.348	88.1424
	C12	117.315	98.035	90.8931
	C12 DC	123.814	96.923	130.797
	C12:1	111.85	99.2407	122.103
	C14	141.692	83.4224	94.9379
	C14:1	135.142	91.803	119.089
	C14:1 OH	147.748	96.826	99.7843
	C14:2	157.88	102.798	96.6217
	C14:2 OH	153.298	102.45	105.759
	C16	173.675	85.3088	94.5614
	C16 OH	170.095	88.3579	109.353
	C16:1	127.093	97.2424	135.855
	C16:1 OH	138.766	101.768	111.78
	C16:2	151.956	114.354	109.847
	C16:2 OH	115.782	106.537	103.057
	C18:0	119.955	91.0291	94.5098
	C18:1	131.793	91.0916	78.8597
	C18:1 OH	106.274	104.392	90.8985
	C18:2	101.607	99.1666	118.614
TAG	TAG C48:0	172.729	290.838	463.582
	TAG C50:0	180.404	300.832	523.972
	TAG C50:1	178.932	288.036	481.803
	TAG C50:2	191.599	299.661	584.773
	TAG C50:3	215.598	237.959	402.923
	TAG C52:0	168.697	259.409	518.842
	TAG C52:1	173.423	274.767	518.215
	TAG C52:2	157.018	244.157	330.343
	TAG C52:3	165.515	194.265	263.793
	TAG C52:4	163.811	136.674	253.752
	TAG C52:5	171.295	108.441	123.719
	TAG C52:6	119.818	170.118	224.358
	TAG C54:1	120.152	256.403	498.728
	TAG C54:2	137.277	202.244	259.654
	TAG C54:3	169.8	170.591	242.735
	TAG C54:4	189.918	181.162	373.881
	TAG C54:5	147.368	110.418	171.043
	TAG C54:6	142.641	84.4916	54.493
	TAG C54:7	83.0158	90.5055	107.468
	TAG C54:8	114.613	96.5046	93.4895
	TAG C54:9	93.3967	53.7412	160.331
	TAG C56:1	114.264	326.782	591.872
	TAG C56:2	110.183	230.339	366.848
	TAG C56:3	99.5837	172.018	63.8508
	TAG C56:4	74.6731	95.6067	113.804
	TAG C56:5	112.254	90.8207	93.1677
	TAG C56:6	114.199	80.4886	73.3693
	TAG C56:7	100.399	83.835	78.1329
	TAG C56:8	91.158	88.5965	76.6487
	TAG C58:2	91.0244	179.651	324.04
	TAG C58:3	65.3633	106.048	67.5859
	TAG C58:4	61.0367	137.688	88.1457
	TAG C58:5	93.2029	110.365	114.197
	TAG C58:6	84.1579	84.5757	63.5766
	TAG C58:7	105.288	124.007	47.6568
	TAG C60:3	67.3525	311.609	346.569
	TAG C60:4	90.5642	95.4851	133.443
	TAG C60:5	89.7409	114.597	241.972
	TAG C60:6	52.7313	140.653	50.1437

## Sheet: suppl. table S2
supplemental table S2:
SH-SY5Y - unprocessed data:
SH-SY5Y						SH-SY5Y						SH-SY5Y						SH-SY5Y						SH-SY5Y						SH-SY5Y
species	lipid	mean	SEM	p-value		species	lipid	mean	SEM	p-value		species	lipid	mean	SEM	p-value		species	lipid	mean	SEM	p-value		species	lipid	mean	SEM	p-value		species	lipid	mean	SEM	p-value
TAG unprocessed data	TAG C48:0	172.729	5.23912	6.8685e-05		PC aa unprocessed data	PC aa C20:0	94.4528	5.47459	0.618597		PC ae unprocessed data	PC ae C30:0	112.858	10.1348	0.159779		Lyso PC unprocessed data	Lyso PC C06:0	150.023	19.0842	0.0453326		SM unprocessed data	SM C14:1 OH	126.088	12.4956	0.221739		Carntine unprocessed data	C0	124.986	7.01185	0.155986
	TAG C50:0	180.404	6.01762	0.000108776			PC aa C24:0	107.639	17.9751	0.477316			PC ae C30:1	152.607	10.0977	0.264934			Lyso PC C10:0	161.453	11.3666	0.0207286			SM C16:0	169.44	12.0693	0.0471903			C02	115.931	5.20119	0.318264
	TAG C50:1	178.932	4.81735	2.68883e-05			PC aa C26:0	104.893	18.8171	0.561482			PC ae C30:2	159.99	10.5672	0.318376			Lyso PC C12:0	150.036	7.31343	0.0436822			SM C16:1	112.858	11.8749	0.42505			C03	140.198	4.05171	0.0384609
	TAG C50:2	191.599	4.52215	1.56626e-05			PC aa C28:0	95.9762	12.5331	0.697218			PC ae C32:1	140.565	10.2565	0.411765			Lyso PC C14:0	133.454	11.9915	0.126597			SM C16:1 OH	152.607	12.5403	0.0162241			C03 OH	120.631	5.20739	0.214863
	TAG C50:3	215.598	6.15735	1.6133e-05			PC aa C28:1	89.022	13.5805	0.113662			PC ae C32:2	162.735	10.217	0.0202059			Lyso PC C16:0	116.36	14.2862	0.398089			SM C18:0	159.99	12.1348	0.0086037			C03:1	119.751	4.59716	0.238625
	TAG C52:0	168.697	9.10054	0.00179983			PC aa C30:0	114.407	12.5427	0.146864			PC ae C34:0	131.03	10.1925	0.0497512			Lyso PC C16:1	114.447	15.5059	0.449226			SM C18:1	140.565	11.8607	0.043968			C04	131.454	5.27834	0.0914357
	TAG C52:1	173.423	10.1119	0.000216804			PC aa C30:2	103.566	12.461	0.549469			PC ae C34:1	124.027	10.2354	0.440436			Lyso PC C17:0	129.776	3.06088	0.167519			SM C20:2	162.735	11.5847	0.008663			C04 OH / C3 DC	128.79	4.67162	0.110174
	TAG C52:2	157.018	6.86787	0.000716			PC aa C32:0	97.3319	12.8828	0.603531			PC ae C34:2	126.164	10.194	0.341292			Lyso PC C18:0	133.077	11.5619	0.119434			SM C22:1 OH	131.03	12.613	0.0911244			C04:1	122.116	3.33695	0.190198
	TAG C52:3	165.515	4.65108	0.000243145			PC aa C32:1	103.066	12.5514	0.691721			PC ae C34:3	138.085	10.2197	0.370846			Lyso PC C18:1	140.079	12.8981	0.0686477			SM C22:2 OH	124.027	12.6575	0.168049			C05	124.52	5.22429	0.156477
	TAG C52:4	163.811	4.50862	0.00360424			PC aa C32:2	94.1053	12.6574	0.199612			PC ae C36:0	128.233	10.0732	0.0752216			Lyso PC C18:2	117.636	9.95678	0.353519			SM C22:3	126.164	11.3344	0.144019			C05 M DC	134.442	3.0366	0.05693
	TAG C52:5	171.295	5.88965	0.00724482			PC aa C32:3	104.334	12.4125	0.570841			PC ae C36:1	134.203	10.4739	0.188058			Lyso PC C18:3	106.676	8.62764	0.707361			SM C24:0	138.085	12.3111	0.0561809			C05 OH / C3 M DC	126.497	5.93896	0.100525
	TAG C52:6	119.818	7.96	0.266625			PC aa C34:1	99.5414	12.5593	0.954108			PC ae C36:2	122.46	10.2879	0.399964			Lyso PC C20:0	101.668	11.2685	0.925474			SM C24:1	128.233	11.9582	0.113198			C05:1	120.201	4.33397	0.223546
	TAG C54:1	120.152	14.2648	0.0154571			PC aa C34:2	101.374	12.546	0.821132			PC ae C36:3	129.244	10.2737	0.371281			Lyso PC C20:3	98.6264	8.83359	0.935516			SM C24:1 OH	134.203	12.7458	0.0756858			C05:1 DC	127.25	2.83584	0.119678
	TAG C54:2	137.277	10.5135	0.000221689			PC aa C34:3	98.8798	12.5608	0.88972			PC ae C36:4	124.986	9.98766	0.0397272			Lyso PC C20:4	104.796	9.03404	0.7925			SM C26:0	122.46	12.291	0.19714			C06 / C4:1 DC	120.512	4.55831	0.22491
	TAG C54:3	169.8	13.3013	0.000194463			PC aa C34:4	91.3293	12.0409	0.308229			PC ae C36:5	115.931	9.70602	0.116314			Lyso PC C20:5	112.507	6.1082	0.494479			SM C26:1	129.244	11.9734	0.11635			C06 OH / C5 DC	118.127	6.2994	0.272729
	TAG C54:4	189.918	11.0731	0.0109756			PC aa C36:0	120.517	12.5582	0.0405964			PC ae C38:0	140.198	10.0505	0.105251			Lyso PC C22:0	127.677	17.1456	0.163217									C06:1	122.083	5.46376	0.190293
	TAG C54:5	147.368	6.96483	0.515917			PC aa C36:1	89.8073	12.591	0.239562			PC ae C38:1	120.631	9.97883	0.145373			Lyso PC C22:6	114.82	8.86533	0.40833									C07 DC	115.47	6.89019	0.341105
	TAG C54:6	142.641	6.25478	0.237427			PC aa C36:2	96.4496	12.5798	0.605384			PC ae C38:2	119.751	10.1129	0.080189			Lyso PC C24:0	95.6936	16.047	0.793252									C08	127.423	5.60931	0.0972537
	TAG C54:7	83.0158	5.34972	0.246696			PC aa C36:3	95.4275	12.6436	0.477095			PC ae C38:3	131.454	10.174	0.0648401			Lyso PC C26:0	95.3395	17.1582	0.770587									C08:1	137.46	3.86156	0.0451686
	TAG C54:8	114.613	4.38296	0.879579			PC aa C36:4	98.6562	12.4194	0.863632			PC ae C38:4	128.79	9.88803	0.126861			Lyso PC C26:1	86.8451	12.5173	0.44483									C09	117.453	2.7112	0.275322
	TAG C54:9	93.3967	5.98654	0.435157			PC aa C36:5	98.7696	12.4318	0.851829			PC ae C38:5	122.116	9.8362	0.214328			Lyso PC C28:0	95.4692	13.031	0.794975									C10	107.87	4.59968	0.608475
	TAG C56:1	114.264	12.4393	0.757789			PC aa C36:6	95.3962	12.7592	0.587751			PC ae C38:6	124.52	9.95915	0.0755695			Lyso PC C28:1	113.223	16.6862	0.484294									C10:1	108.403	4.91551	0.580385
	TAG C56:2	110.183	8.80114	0.130276			PC aa C38:0	89.285	12.3192	0.157979			PC ae C40:0	134.442	9.44168	0.0850036															C10:2	130.623	4.90366	0.0989973
	TAG C56:3	99.5837	13.3513	0.790489			PC aa C38:1	93.3523	12.7292	0.481765			PC ae C40:1 / PC aa C40:8	126.497	9.04519	0.225184															C12	117.315	8.61955	0.241888
	TAG C56:4	74.6731	11.036	0.714269			PC aa C38:3	94.3918	12.6334	0.604748			PC ae C40:2	120.201	9.97625	0.0446038															C12 DC	123.814	7.50232	0.179157
	TAG C56:5	112.254	21.9034	0.1146			PC aa C38:4	92.1492	12.482	0.312361			PC ae C40:3	127.25	9.82974	0.267744															C12:1	111.85	4.16143	0.453609
	TAG C56:6	114.199	22.9605	0.305893			PC aa C38:5	94.1637	12.1345	0.553658			PC ae C40:4	120.512	9.87928	0.02297															C14	141.692	5.36315	0.0762787
	TAG C56:7	100.399	6.22731	0.661466			PC aa C38:6	91.0935	11.9293	0.156031			PC ae C40:5	118.127	9.92917	0.275003															C14:1	135.142	4.28926	0.108398
	TAG C56:8	91.158	9.96517	0.267019			PC aa C40:0	110.076	12.403	0.30892			PC ae C40:6	122.083	9.95158	0.09684															C14:1 OH	147.748	5.94711	0.0489423
	TAG C58:2	91.0244	8.83694	0.504929			PC aa C40:1	94.082	12.9763	0.516569			PC ae C42:0	115.47	10.1524	0.0213694															C14:2	157.88	5.56697	0.0316737
	TAG C58:3	65.3633	8.40975	0.638552			PC aa C40:2	101.994	13.2108	0.792679			PC ae C42:1	127.423	9.41077	0.00254813															C14:2 OH	153.298	4.46938	0.0364981
	TAG C58:4	61.0367	21.1571	0.469785			PC aa C40:3	103.982	12.3877	0.769105			PC ae C42:2	137.46	9.48602	0.197381															C16	173.675	3.65004	0.0111315
	TAG C58:5	93.2029	23.2887	0.13702			PC aa C40:4	86.2747	12.8181	0.0444723			PC ae C42:3	117.453	9.80492	0.0938057															C16 OH	170.095	3.94982	0.0119263
	TAG C58:6	84.1579	21.109	0.110836			PC aa C40:5	111.004	12.0938	0.268145			PC ae C42:4	107.87	10.1652	0.0183325															C16:1	127.093	4.78878	0.200344
	TAG C58:7	105.288	10.3591	0.874506			PC aa C40:6	86.7735	11.8612	0.0567638			PC ae C42:5	108.403	9.79661	0.0176932															C16:1 OH	138.766	3.96535	0.100791
	TAG C60:3	67.3525	19.3788	0.418052			PC aa C42:0	95.4719	12.1074	0.557568			PC ae C44:3	130.623	10.1805	0.591457															C16:2	151.956	2.39061	0.0306087
	TAG C60:4	90.5642	20.5906	0.993415			PC aa C42:1	98.6124	12.3907	0.887369			PC ae C44:4	117.315	8.66912	0.607432															C16:2 OH	115.782	5.59703	0.407864
	TAG C60:5	89.7409	25.086	0.282541			PC aa C42:2	103.925	12.4787	0.747547			PC ae C44:5	123.814	10.1126	0.225865															C18:0	119.955	5.98655	0.303136
	TAG C60:6	52.7313	13.3471	0.952213			PC aa C42:4	119.024	13.2177	0.191449			PC ae C44:6	111.85	9.83615	0.0943412															C18:1	131.793	6.40058	0.146142
							PC aa C42:5	90.3998	12.7768	0.135788																					C18:1 OH	106.274	4.1354	0.723232
							PC aa C42:6	110.023	12.2325	0.251461																					C18:2	101.607	5.30532	0.92455
							PC aa C44:0	123.924	12.6799	0.444188
							PC aa C48:0	136.44	16.6619	0.0557252

## Sheet: suppl. table S3
supplemental table S3:
HEK - unprocessed data:
HEK						HEK						HEK						HEK						HEK							HEK
species	lipid	mean	SEM	p-value		species	lipid	mean	SEM	p-value		species	lipid	mean	SEM	p-value		species	lipid	mean	SEM	p-value		species	lipid	mean	SEM	p-value			species	lipid	mean	SEM	p-value
TAG unprocessed data	TAG C48:0	290.838	6.82769	5.91984e-07		PC aa unprocessed data	PC aa C20:0	104.831	2.69633	0.225683		PC ae unprocessed data	PC ae C30:0	103.088	3.7571	0.755797		Lyso PC unprocessed data	Lyso PC C06:0	128.635	15.5062	0.390457		SM unprocessed data	SM C14:1 OH	128.796	4.2975	0.0215931			Carntine unprocessed data	C0	100.19	3.22277	0.979104
	TAG C50:0	300.832	6.40445	4.52272e-07			PC aa C24:0	113.929	9.58728	0.24555			PC ae C30:1	136.549	3.8673	0.00327827			Lyso PC C10:0	110.864	12.7064	0.482879			SM C16:0	121.353	2.98503	0.0400641				C02	105.883	3.55592	0.397127
	TAG C50:1	288.036	4.75953	1.8806e-07			PC aa C26:0	120.261	12.7629	0.22534			PC ae C30:2	147.473	3.47183	0.000234502			Lyso PC C12:0	98.3416	6.8158	0.857178			SM C16:1	118.488	3.57904	0.0797577				C03	57.7231	4.55208	1.5646e-05
	TAG C50:2	299.661	5.84003	3.50498e-08			PC aa C28:0	152.236	4.7338	0.000706887			PC ae C32:1	120.886	3.66129	0.0430346			Lyso PC C14:0	137.784	3.02364	0.000427919			SM C16:1 OH	130.867	4.37008	0.0160266				C03 OH	117.877	5.00812	0.0322679
	TAG C50:3	237.959	6.84459	1.38306e-05			PC aa C28:1	124.88	4.66902	0.0144921			PC ae C32:2	146.678	4.20344	0.000630971			Lyso PC C16:0	134.311	3.60195	0.00400589			SM C18:0	135.134	4.1318	0.00476558				C03:1	111.678	6.90374	0.273094
	TAG C52:0	259.409	9.23472	5.66727e-06			PC aa C30:0	138.004	5.18196	0.00907328			PC ae C34:0	98.017	4.02306	0.830748			Lyso PC C16:1	145.405	4.26344	0.00087834			SM C18:1	135.375	4.28559	0.00547626				C04	123.657	2.93508	0.00193686
	TAG C52:1	274.767	11.6808	9.96652e-07			PC aa C30:2	126.877	6.21468	0.0612164			PC ae C34:1	97.8066	3.59658	0.804815			Lyso PC C17:0	100.351	2.2565	0.951629			SM C20:2	108.064	2.50463	0.30363				C04 OH / C3 DC	108.95	3.41156	0.189427
	TAG C52:2	244.157	11.1133	6.0155e-07			PC aa C32:0	134.936	5.07026	0.0123745			PC ae C34:2	109.315	4.05801	0.342841			Lyso PC C18:0	132.218	3.8011	0.00124845			SM C22:1 OH	78.2392	3.6976	0.0280866				C04:1	98.4308	3.81799	0.792331
	TAG C52:3	194.265	5.81036	0.000109914			PC aa C32:1	132.169	5.4778	0.0168373			PC ae C34:3	107.853	4.74436	0.44479			Lyso PC C18:1	126.033	4.11902	0.0344245			SM C22:2 OH	75.6733	4.02771	0.0196676				C05	89.4044	3.74839	0.0465313
	TAG C52:4	136.674	5.34743	0.093225			PC aa C32:2	138.401	5.73325	0.00808314			PC ae C36:0	91.8861	4.33465	0.381757			Lyso PC C18:2	113.463	5.16005	0.231513			SM C22:3	109.179	4.35913	0.313857				C05 M DC	103.915	3.08467	0.338103
	TAG C52:5	108.441	6.60392	0.748674			PC aa C32:3	136.891	4.94971	0.0077974			PC ae C36:1	85.4081	4.23528	0.115029			Lyso PC C18:3	113.11	4.82669	0.195741			SM C24:0	125.297	3.29408	0.0146795				C05 OH / C3 M DC	99.6481	3.63133	0.943468
	TAG C52:6	170.118	7.93473	0.00282615			PC aa C34:1	114.411	4.5924	0.192096			PC ae C36:2	75.5074	4.09672	0.011437			Lyso PC C20:0	115.837	2.28137	0.0280117			SM C24:1	113.944	3.33097	0.137193				C05:1	111.55	6.1438	0.210005
	TAG C54:1	256.403	16.0737	2.83112e-05			PC aa C34:2	121.717	5.54673	0.0815419			PC ae C36:3	83.3501	4.56942	0.0923656			Lyso PC C20:3	128.551	5.56545	0.0118795			SM C24:1 OH	78.0933	3.32184	0.0260971				C05:1 DC	105.078	7.36503	0.677022
	TAG C54:2	202.244	19.7648	0.000975			PC aa C34:3	113.689	5.4258	0.24945			PC ae C36:4	98.6044	3.76229	0.878187			Lyso PC C20:4	120.689	5.70091	0.0416253			SM C26:0	103.677	3.62205	0.691237				C06 / C4:1 DC	99.6721	4.8245	0.955996
	TAG C54:3	170.591	16.5745	0.0154173			PC aa C34:4	109.223	4.86421	0.220739			PC ae C36:5	93.9809	3.99844	0.492603			Lyso PC C20:5	122.12	6.24253	0.0200566			SM C26:1	93.0535	3.63248	0.434098				C06 OH / C5 DC	102.907	5.86676	0.703518
	TAG C54:4	181.162	13.6036	0.477291			PC aa C36:0	114.086	4.77155	0.214618			PC ae C38:0	95.7264	3.90468	0.626033			Lyso PC C22:0	107.428	5.81375	0.361824										C06:1	106.418	3.88111	0.503283
	TAG C54:5	110.418	8.30314	0.87432			PC aa C36:1	112.272	4.9879	0.276323			PC ae C38:1	80.1675	4.28766	0.0336028			Lyso PC C22:6	123.624	5.5661	0.0125891										C07 DC	97.6286	11.562	0.880667
	TAG C54:6	84.4916	12.5832	0.747607			PC aa C36:2	104.754	4.84214	0.652597			PC ae C38:2	71.3955	3.99403	0.00385755			Lyso PC C24:0	107.943	8.0534	0.41727										C08	114.496	5.48336	0.0976248
	TAG C54:7	90.5055	6.06395	0.473153			PC aa C36:3	102.067	4.95758	0.849623			PC ae C38:3	72.1403	4.01003	0.00467593			Lyso PC C26:0	105.989	12.4343	0.703215										C08:1	101.04	5.5265	0.903345
	TAG C54:8	96.5046	6.35624	0.787511			PC aa C36:4	127.59	5.3844	0.0331939			PC ae C38:4	79.2581	3.74271	0.022214			Lyso PC C26:1	103.758	3.19963	0.402089										C09	107.497	10.9786	0.574723
	TAG C54:9	53.7412	8.39411	0.32169			PC aa C36:5	107.962	5.8144	0.436145			PC ae C38:5	76.6182	3.74428	0.00974133			Lyso PC C28:0	97.5923	4.60755	0.768882										C10	116.749	5.53554	0.0510388
	TAG C56:1	326.782	14.3166	0.388328			PC aa C36:6	109.07	5.59932	0.439128			PC ae C38:6	95.5539	3.72307	0.614433			Lyso PC C28:1	93.5364	8.75465	0.577877										C10:1	99.6121	7.88357	0.975888
	TAG C56:2	230.339	21.3098	3.44152e-05			PC aa C38:0	111.308	4.98489	0.319337			PC ae C40:0	105.793	3.69179	0.526532																C10:2	112.348	7.13631	0.177943
	TAG C56:3	172.018	26.1971	0.843726			PC aa C38:1	132.615	4.896	0.0120621			PC ae C40:1 / PC aa C40:8	84.6168	4.10445	0.0942476																C12	98.035	6.88484	0.832151
	TAG C56:4	95.6067	16.9763	0.799868			PC aa C38:3	97.5227	5.26833	0.816606			PC ae C40:2	74.0104	4.3394	0.00690306																C12 DC	96.923	6.62374	0.772326
	TAG C56:5	90.8207	40.2621	0.234644			PC aa C38:4	119.52	5.11128	0.0927332			PC ae C40:3	69.9181	3.75728	0.00194297																C12:1	99.2407	7.95775	0.950847
	TAG C56:6	80.4886	26.265	0.305893			PC aa C38:5	125.577	6.05482	0.0287563			PC ae C40:4	80.55	4.24774	0.0387842																C14	83.4224	6.9081	0.109707
	TAG C56:7	83.835	6.90331	0.107693			PC aa C38:6	125.008	4.16825	0.0250592			PC ae C40:5	80.3839	3.84739	0.0277111																C14:1	91.803	8.15107	0.493156
	TAG C56:8	88.5965	8.5865	0.207564			PC aa C40:0	126.563	5.59136	0.0400137			PC ae C40:6	69.0841	3.9711	0.00154122																C14:1 OH	96.826	4.96819	0.682279
	TAG C58:2	179.651	17.2588	0.55713			PC aa C40:1	136.209	4.66534	0.00795911			PC ae C42:0	113.502	4.63853	0.172528																C14:2	102.798	9.66199	0.827194
	TAG C58:3	106.048	11.4834	0.714837			PC aa C40:2	97.7482	4.94783	0.833812			PC ae C42:1	86.9435	3.88776	0.161826																C14:2 OH	102.45	4.45661	0.758341
	TAG C58:4	137.688	27.3365	6.91698e-08			PC aa C40:3	77.8402	5.41167	0.0421878			PC ae C42:2	75.2822	4.70859	0.0130893																C16	85.3088	5.52982	0.169851
	TAG C58:5	110.365	32.9402	0.755237			PC aa C40:4	97.6408	4.53684	0.81293			PC ae C42:3	71.8949	4.57528	0.00506891																C16 OH	88.3579	2.99893	0.0258666
	TAG C58:6	84.5757	15.7619	8.9109e-07			PC aa C40:5	125.224	4.95026	0.0227278			PC ae C42:4	77.9236	4.12322	0.0168392																C16:1	97.2424	4.05377	0.673497
	TAG C58:7	124.007	9.03182	0.0271272			PC aa C40:6	121.83	6.01084	0.0634344			PC ae C42:5	84.725	3.09233	0.0826092																C16:1 OH	101.768	4.47972	0.824093
	TAG C60:3	311.609	20.7633	4.85119e-07			PC aa C42:0	149.853	5.39686	0.00209458			PC ae C44:3	75.6774	4.5028	0.00830514																C16:2	114.354	5.68919	0.0877882
	TAG C60:4	95.4851	39.1359	1.15287e-09			PC aa C42:1	185.222	4.24646	8.19416e-06			PC ae C44:4	80.9334	3.72948	0.0258673																C16:2 OH	106.537	5.332	0.427418
	TAG C60:5	114.597	17.7021	7.04161e-08			PC aa C42:2	129.936	5.26219	0.0232767			PC ae C44:5	86.4989	4.39849	0.133449																C18:0	91.0291	8.57523	0.436035
	TAG C60:6	140.653	10.3804	5.30404e-06			PC aa C42:4	86.4076	5.88867	0.211873			PC ae C44:6	85.2789	4.85821	0.108235																C18:1	91.0916	5.54895	0.362832
							PC aa C42:5	108.801	4.46035	0.359075																						C18:1 OH	104.392	2.78936	0.322541
							PC aa C42:6	119.741	6.06398	0.0925171																						C18:2	99.1666	7.58129	0.92998
							PC aa C44:0	150.057	3.2282	0.00104539
							PC aa C48:0	151.652	5.96706	0.0048592

## Sheet: suppl. table S4
supplemental table S4:
Calu-3 - unprocessed data:
Calu-3						Calu-3						Calu-3						Calu-3						Calu-3						Calu-3
species	lipid	mean	SEM	p-value		species	lipid	mean	SEM	p-value		species	lipid	mean	SEM	p-value		species	lipid	mean	SEM	p-value		species	lipid	mean	SEM	p-value		species	lipid	mean	SEM	p-value
TAG unprocessed data	TAG C48:0	463.582	4.16149	4.22588e-11		PC aa unprocessed data	PC aa C20:0	97.2433	4.65497	0.654874		PC ae unprocessed data	PC ae C30:0	58.1203	6.67744	2.65696e-05		Lyso PC unprocessed data	Lyso PC C06:0	69.752	15.0039	0.193591		SM unprocessed data	SM C14:1 OH	116.937	7.31498	0.115128		Carntine unprocessed data	C0	104.301	8.04527	0.723827
	TAG C50:0	523.972	3.90891	1.57805e-11			PC aa C24:0	97.1973	13.551	0.874805			PC ae C30:1	115.507	6.62496	0.117861			Lyso PC C10:0	89.5555	8.28404	0.665524			SM C16:0	108.612	6.61762	0.297595			C02	105.403	5.08902	0.620896
	TAG C50:1	481.803	4.27821	2.7471e-11			PC aa C26:0	108.004	15.3448	0.711792			PC ae C30:2	146.207	5.79939	0.000380112			Lyso PC C12:0	104.545	14.5338	0.793822			SM C16:1	113.55	6.91168	0.172467			C03	73.579	22.8858	0.154858
	TAG C50:2	584.773	3.85276	5.33406e-11			PC aa C28:0	96.8727	7.44349	0.749904			PC ae C32:1	121.646	6.61851	0.0424868			Lyso PC C14:0	110.639	10.1805	0.394211			SM C16:1 OH	136.68	7.73764	0.00868663			C03 OH	104.23	8.36124	0.67428
	TAG C50:3	402.923	4.02208	2.14001e-10			PC aa C28:1	121.498	7.55389	0.0791002			PC ae C32:2	195.396	6.95958	1.17041e-05			Lyso PC C16:0	141.759	9.57281	0.0100769			SM C18:0	195.531	7.24409	2.07508e-05			C03:1	119.744	7.4633	0.0703634
	TAG C52:0	518.842	2.7767	3.44681e-11			PC aa C30:0	96.3048	7.52753	0.682136			PC ae C34:0	85.9197	6.28441	0.0506475			Lyso PC C16:1	240.855	13.9245	0.0010759			SM C18:1	244.377	8.37703	9.85663e-06			C04	113.544	4.1552	0.0674503
	TAG C52:1	518.215	11.9097	3.06692e-11			PC aa C30:2	115.721	7.09245	0.140009			PC ae C34:1	84.7045	6.00692	0.0334213			Lyso PC C17:0	102.168	5.26142	0.719534			SM C20:2	123.412	6.42057	0.0229843			C04 OH / C3 DC	96.288	4.61871	0.493764
	TAG C52:2	330.343	4.91726	1.26359e-09			PC aa C32:0	139.176	7.70051	0.00470984			PC ae C34:2	104.5	6.5122	0.580383			Lyso PC C18:0	168.952	8.42419	0.000367678			SM C22:1 OH	47.6151	6.73232	1.96554e-08			C04:1	104.411	3.58592	0.374553
	TAG C52:3	263.793	4.17956	1.57171e-08			PC aa C32:1	174.211	6.87973	6.06329e-05			PC ae C34:3	88.6151	6.96374	0.143019			Lyso PC C18:1	177.248	12.455	0.00516474			SM C22:2 OH	43.6218	6.2227	2.21897e-09			C05	53.5766	6.51988	2.61781e-07
	TAG C52:4	253.752	3.95172	9.99066e-08			PC aa C32:2	240.921	7.8961	6.43465e-06			PC ae C36:0	96.1322	6.52827	0.599368			Lyso PC C18:2	122.62	10.5897	0.151284			SM C22:3	139.34	6.96594	0.00180899			C05 M DC	97.923	3.59006	0.608151
	TAG C52:5	123.719	4.12078	0.53155			PC aa C32:3	162.271	6.82393	0.000219462			PC ae C36:1	81.9698	6.32137	0.0121873			Lyso PC C18:3	104.767	11.2768	0.750735			SM C24:0	62.0844	6.68243	1.18025e-05			C05 OH / C3 M DC	97.4009	5.76208	0.733846
	TAG C52:6	224.358	4.31762	5.77993e-09			PC aa C34:1	122.828	6.36597	0.0188835			PC ae C36:2	54.5758	6.25919	3.25518e-07			Lyso PC C20:0	112.471	6.69114	0.179174			SM C24:1	70.6	6.6156	0.000187627			C05:1	91.1041	5.74798	0.554533
	TAG C54:1	498.728	16.3962	2.58537e-08			PC aa C34:2	154.049	7.37945	0.000784186			PC ae C36:3	51.1563	6.49158	8.11906e-08			Lyso PC C20:3	130.242	5.42801	0.00145132			SM C24:1 OH	51.3644	6.54961	1.74579e-07			C05:1 DC	105.851	4.76487	0.428561
	TAG C54:2	259.654	16.3067	1.28917e-07			PC aa C34:3	123.694	7.40568	0.0452838			PC ae C36:4	74.5962	6.16394	0.000489469			Lyso PC C20:4	147.374	10.1114	0.00987162			SM C26:0	60.3777	6.42085	4.76863e-06			C06 / C4:1 DC	92.26	2.46258	0.427763
	TAG C54:3	242.735	20.9289	2.58431e-11			PC aa C34:4	107.619	5.78737	0.330155			PC ae C36:5	66.6718	6.2211	1.47505e-05			Lyso PC C20:5	111.017	6.86902	0.236425			SM C26:1	58.6882	6.18308	3.21895e-06			C06 OH / C5 DC	127.598	6.97891	0.0206118
	TAG C54:4	373.881	14.4238	0.00172499			PC aa C36:0	148.04	6.87755	0.000426627			PC ae C38:0	93.2393	6.51495	0.362018			Lyso PC C22:0	91.5419	13.2903	0.599038									C06:1	145.675	3.86213	8.12562e-06
	TAG C54:5	171.043	6.95507	0.867104			PC aa C36:1	137.503	6.80869	0.0017416			PC ae C38:1	61.9867	6.00372	3.94914e-06			Lyso PC C22:6	113.838	9.77781	0.258067									C07 DC	131.115	9.1854	0.0339088
	TAG C54:6	54.493	3.24407	0.0233721			PC aa C36:2	96.6206	6.65979	0.669431			PC ae C38:2	41.5404	6.09463	1.33836e-09			Lyso PC C24:0	107.339	12.1303	0.667369									C08	65.7109	7.37762	0.0287883
	TAG C54:7	107.468	4.64732	0.724004			PC aa C36:3	91.1113	6.98547	0.300021			PC ae C38:3	44.4963	6.12908	1.54838e-09			Lyso PC C26:0	108.913	13.7142	0.640637									C08:1	120.268	6.36292	0.040221
	TAG C54:8	93.4895	4.35138	0.46732			PC aa C36:4	144.096	7.40403	0.0016076			PC ae C38:4	47.5486	6.20294	5.62592e-09			Lyso PC C26:1	113.149	3.6594	0.0335158									C09	104.847	6.472	0.586479
	TAG C54:9	160.331	5.00074	0.0258465			PC aa C36:5	136.946	8.61782	0.0109424			PC ae C38:5	32.5904	6.43284	4.77362e-11			Lyso PC C28:0	73.52	8.94075	0.0139724									C10	110.65	6.01596	0.191808
	TAG C56:1	591.872	11.2037	0.076164			PC aa C36:6	143.001	6.8135	0.00125139			PC ae C38:6	69.9026	6.27964	3.54547e-05			Lyso PC C28:1	106.638	8.14816	0.611454									C10:1	131.783	7.64543	0.0495587
	TAG C56:2	366.848	21.6577	1.95253e-08			PC aa C38:0	67.5482	6.31181	3.31491e-05			PC ae C40:0	105.555	5.75857	0.427621															C10:2	88.1424	6.20819	0.0884103
	TAG C56:3	63.8508	17.9783	0.361813			PC aa C38:1	81.4738	6.68897	0.0128814			PC ae C40:1 / PC aa C40:8	61.7337	6.34145	4.76492e-06															C12	90.8931	5.36124	0.139057
	TAG C56:4	113.804	19.0955	0.00126834			PC aa C38:3	70.2454	6.85698	0.000377105			PC ae C40:2	46.1088	5.83672	7.80948e-09															C12 DC	130.797	7.95656	0.0236445
	TAG C56:5	93.1677	23.6683	0.0459555			PC aa C38:4	109.855	7.08889	0.282921			PC ae C40:3	43.0086	5.71725	1.65257e-09															C12:1	122.103	7.15223	0.0943423
	TAG C56:6	73.3693	29.3741	0.305893			PC aa C38:5	125.058	8.69713	0.0622599			PC ae C40:4	45.9751	6.44146	3.44934e-09															C14	94.9379	9.98434	0.685241
	TAG C56:7	78.1329	4.95904	0.0127288			PC aa C38:6	145.747	6.76492	0.000587734			PC ae C40:5	48.933	6.33012	5.18375e-08															C14:1	119.089	4.07031	0.0197408
	TAG C56:8	76.6487	5.03413	0.000910168			PC aa C40:0	111.551	7.12517	0.188878			PC ae C40:6	39.4727	6.51317	5.37815e-09															C14:1 OH	99.7843	7.40785	0.983501
	TAG C58:2	324.04	11.5373	0.0507036			PC aa C40:1	99.9776	6.5062	0.997619			PC ae C42:0	102.327	5.65676	0.728146															C14:2	96.6217	5.11392	0.613325
	TAG C58:3	67.5859	13.103	0.272347			PC aa C40:2	77.186	6.99281	0.00507068			PC ae C42:1	64.2472	6.56171	5.20721e-05															C14:2 OH	105.759	5.4204	0.5098
	TAG C58:4	88.1457	14.4821	8.27761e-07			PC aa C40:3	56.8097	6.38297	1.88774e-06			PC ae C42:2	41.0652	6.37378	8.40814e-09															C16	94.5614	24.5823	0.834594
	TAG C58:5	114.197	20.9981	0.331592			PC aa C40:4	82.8445	6.68931	0.0169816			PC ae C42:3	50.327	6.52488	1.02659e-07															C16 OH	109.353	5.67371	0.37503
	TAG C58:6	63.5766	12.9202	6.45863e-12			PC aa C40:5	108.945	7.73003	0.376561			PC ae C42:4	50.5274	6.62588	3.75838e-08															C16:1	135.855	13.2848	0.0905774
	TAG C58:7	47.6568	5.68484	0.00678267			PC aa C40:6	127.709	7.02575	0.014428			PC ae C42:5	49.5632	5.97324	6.52149e-08															C16:1 OH	111.78	6.58476	0.209867
	TAG C60:3	346.569	22.2999	8.9221e-06			PC aa C42:0	249.483	7.30757	1.2345e-06			PC ae C44:3	42.7822	5.48936	4.63126e-08															C16:2	109.847	7.06022	0.291189
	TAG C60:4	133.443	11.977	9.86536e-12			PC aa C42:1	298.555	6.94294	2.38776e-07			PC ae C44:4	54.7507	6.91619	4.32487e-07															C16:2 OH	103.057	3.86695	0.682137
	TAG C60:5	241.972	21.8276	1.30274e-11			PC aa C42:2	118.399	6.91829	0.0808696			PC ae C44:5	54.4773	7.05343	2.06372e-07															C18:0	94.5098	23.851	0.83536
	TAG C60:6	50.1437	5.73506	8.13626e-07			PC aa C42:4	67.0495	6.3578	4.21966e-05			PC ae C44:6	67.9379	5.25663	1.66946e-05															C18:1	78.8597	17.1125	0.269845
							PC aa C42:5	92.9012	6.24651	0.28777																					C18:1 OH	90.8985	5.30665	0.193379
							PC aa C42:6	109.529	7.51287	0.335143																					C18:2	118.614	4.62847	0.0549336
							PC aa C44:0	153.64	7.22113	0.000499831
							PC aa C48:0	100.566	11.6719	0.966579
